# Supplementary material for: RAFT synthesis of triply responsive poly[N-[2-(dialkylamino)ethyl]acrylamide]s and their N-substitute determined response
Source: Royal Society of Chemistry journal article supplement (doi:10.1039/c6py00526h), 2016-01-01
Supplement: c6py00526h1.pdf [file c6py00526h1.pdf]

## Supporting Information for

### RAFT synthesis of triply responsive poly[N-[2-(dialkylamino)ethyl]acrylamide]s and the N-substitute determined response

Ke Wang,<sup>a</sup> Zefeng Song,<sup>a</sup> Chonggao Liu,<sup>a</sup> Wangqing Zhang<sup>\*a,b</sup>

<sup>a</sup>Key Laboratory of Functional Polymer Materials of the Ministry of Education, Institute of Polymer Chemistry, Nankai University, Tianjin 300071, China.

<sup>b</sup>Collaborative Innovation Center of Chemical Science and Engineering (Tianjin), Nankai University, Tianjin 300071, China.

\*To whom correspondence should be addressed. E-mail: (W. Zhang) wqzhang@nankai.edu.cn, Tel: +86-22-23509794, Fax: +86-22-23503510.

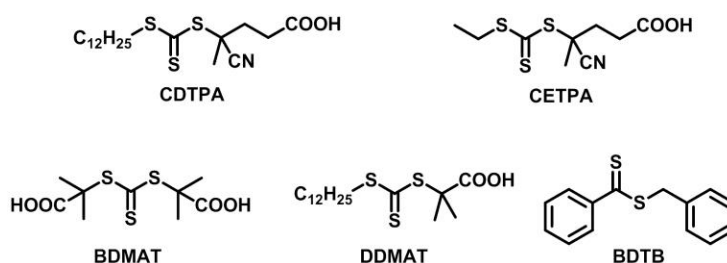

**Scheme S1.** The RAFT agents of CDTA, CETPA, BDMAT, DDMAT, and BDTB.

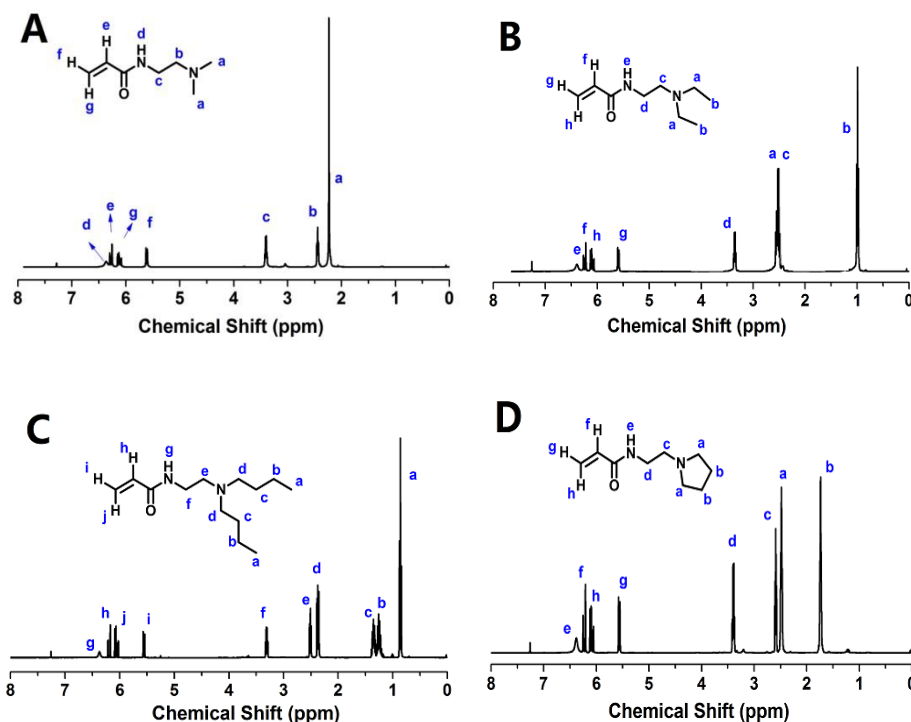

**Figure S1.** The <sup>1</sup>H NMR spectra of DMAEAM (A), DEAEAM (B), DBAEAM (C) and EPyAM (D) in CDCl<sub>3</sub>.

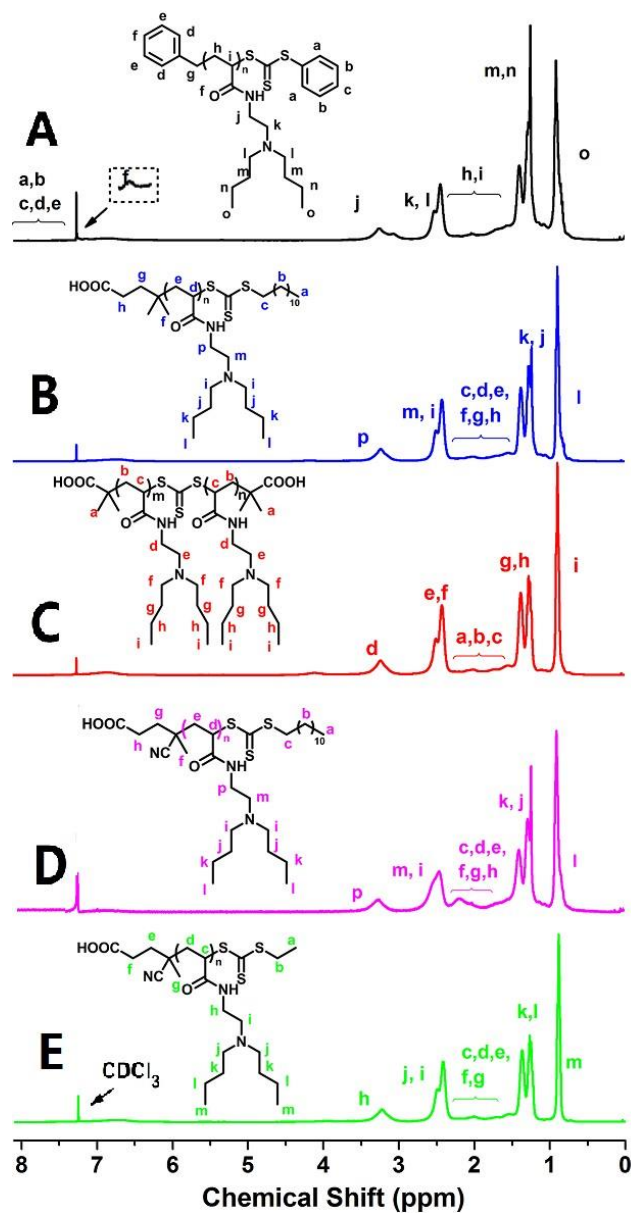

**Figure S2.** The  $^1\text{H}$  NMR spectra of PDBAEAM-BDTB (A), PDBAEAM-DDMAT (B), PDBAEAM-BDMAT (C), PDBAEAM-CDTPA (D) and PDBAEAM-CETPA (E) in  $\text{CDCl}_3$ .

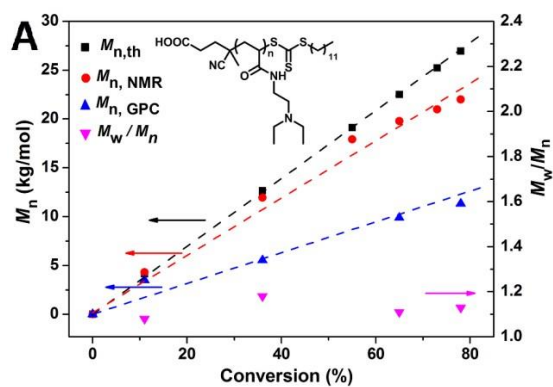

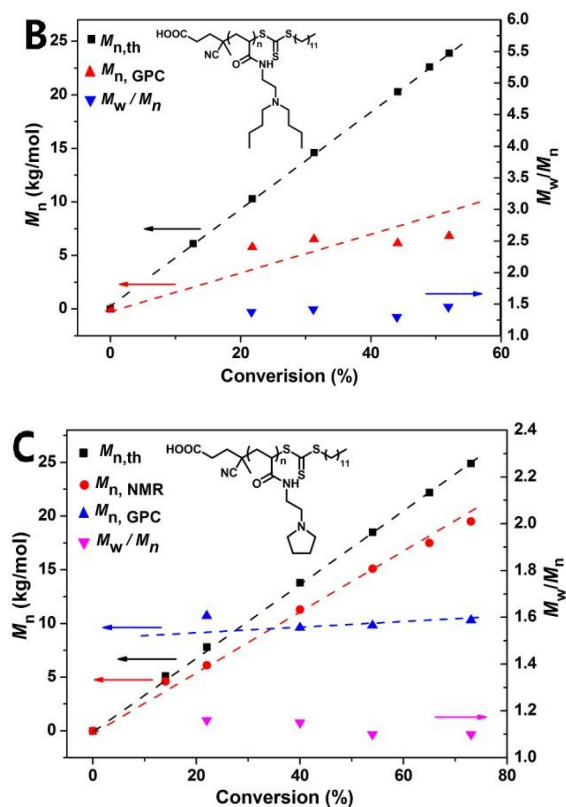

**Figure S3.** The evolution of the molecular weight and the  $\bar{D}$  ( $M_w/M_n$ ) value of PDEAEAM (A), PDBAEAM (B) and PEPyAM (C) with the monomer conversion in the solution RAFT polymerization.

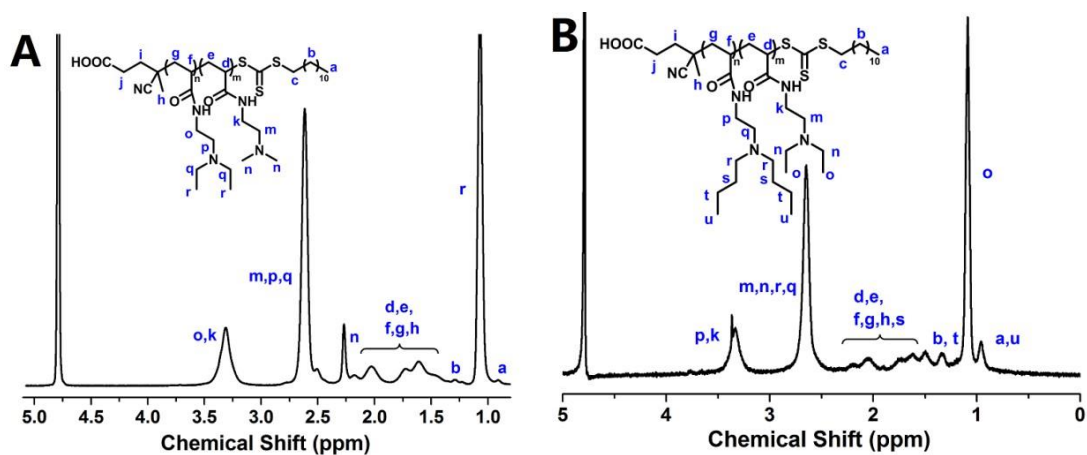

**Figure S4.** The  $^1H$  NMR spectra of PDMAEAM-*co*-PDEAEAM (A) and PDBAEAM-*co*-PDEAEAM (B) in  $D_2O$ .
